sympathetic response to abdominal surgery. *Anesth Analg* 1987; 66:1008–13

52. Thiele RH, Rea KM, Turrentine FE, Friel CM, Hassinger TE, McMurry TL, Goudreau BJ, Umapathi BA, Kron IL, Sawyer RG, Hedrick TL: Standardization of care: Impact of an enhanced recovery protocol on length of stay, complications, and direct costs after colorectal surgery. *J Am Coll Surg* 2015; 220:430–43
53. El-Tahan MR, Warda OM, Diab DG, Ramzy EA, Matter MK: A randomized study of the effects of perioperative i.v. lidocaine

on hemodynamic and hormonal responses for cesarean section. *J Anesth* 2009; 23:215–21

54. Choi E, Lee H, Park HS, Lee GY, Kim YJ, Baik HJ: Effect of intraoperative infusion of ketamine on remifentanyl-induced hyperalgesia. *Korean J Anesthesiol* 2015; 68:476–80
55. Naito Y, Tamai S, Shingu K, Shindo K, Matsui T, Segawa H, Nakai Y, Mori K: Responses of plasma adrenocorticotrophic hormone, cortisol, and cytokines during and after upper abdominal surgery. *ANESTHESIOLOGY* 1992; 77:426–31

## ANESTHESIOLOGY REFLECTIONS FROM THE WOOD LIBRARY-MUSEUM

### From Chloroform to Home Rule: Queen Victoria Rides One Wave and Resists Another

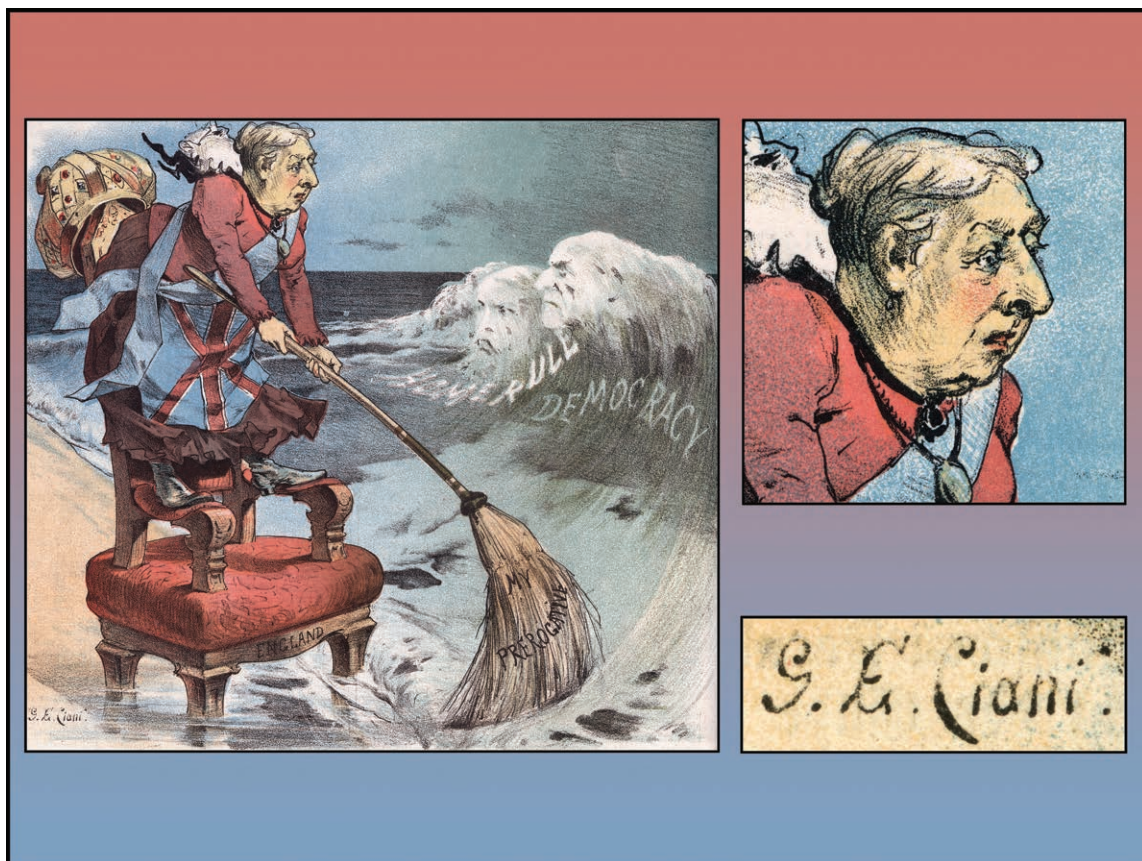

An American humor magazine, *Puck*, covered its February 18, 1886 issue with a political cartoon signed by its artist, G. E. Ciani (born c. 1847, signed *below right*). In “Her Resolute Opposition” (*left*), the illustrator depicts a determined Queen Victoria (1819 to 1901, close up *above right*) struggling to sweep back the tide of public sentiment. At that time, the Irish Parliamentary Party of Charles Parnell (1846 to 1891) had tipped Parliamentary balance away from the Conservatives of Lord Robert Cecil Salisbury (1830 to 1903) and toward the Liberals of William Gladstone (1809 to 1898). Cartoonist Ciani depicts the visages of Parnell and Gladstone cresting the waves of “Home Rule” and “Democracy,” respectively, as they crash by Salisbury to face the monarch’s broom of “Prerogative.” This is nearly 33 yr after Victoria “swept” in aristocratic acceptance and then public enthusiasm for chloroform analgesia and anesthesia during childbirth. (Copyright © the American Society of Anesthesiologists’ Wood Library-Museum of Anesthesiology.)

George S. Bause, M.D., M.P.H., Honorary Curator and Laureate of the History of Anesthesia, Wood Library-Museum of Anesthesiology, Schaumburg, Illinois, and Clinical Associate Professor, Case Western Reserve University, Cleveland, Ohio. UJYC@aol.com.
